# Supplementary material for: Primary Metabolism Is Distinctly Modulated by Plant Resistance Inducers in Coffea arabica Leaves Infected by Hemileia vastatrix
Source: PubMed Central journal article supplement (PMC7099052; doi:10.3389/fpls.2020.00309), 2020-03-20

**Supplemental Figure S1** – Two dimensional electrophoresis gels (18 cm gels, pI 4-7). **(A)** Representative 2-DE gel of protein from coffee leaves. Numbers indicated the spots that were isolated from the gel and proteins subsequently identified by MALDI-TOF/TOF-MS (for additional details, see Table S3). **(B)** Biological replicas of 2-DE gels preformed. The experimental design comprises: three times points (3d, 5d, 7d) and three treatments (control, Greenforce CuCa, ASM) in non-inoculated and *H. vastatrix* inoculated plants (**pages 2 to 16**).

**A**

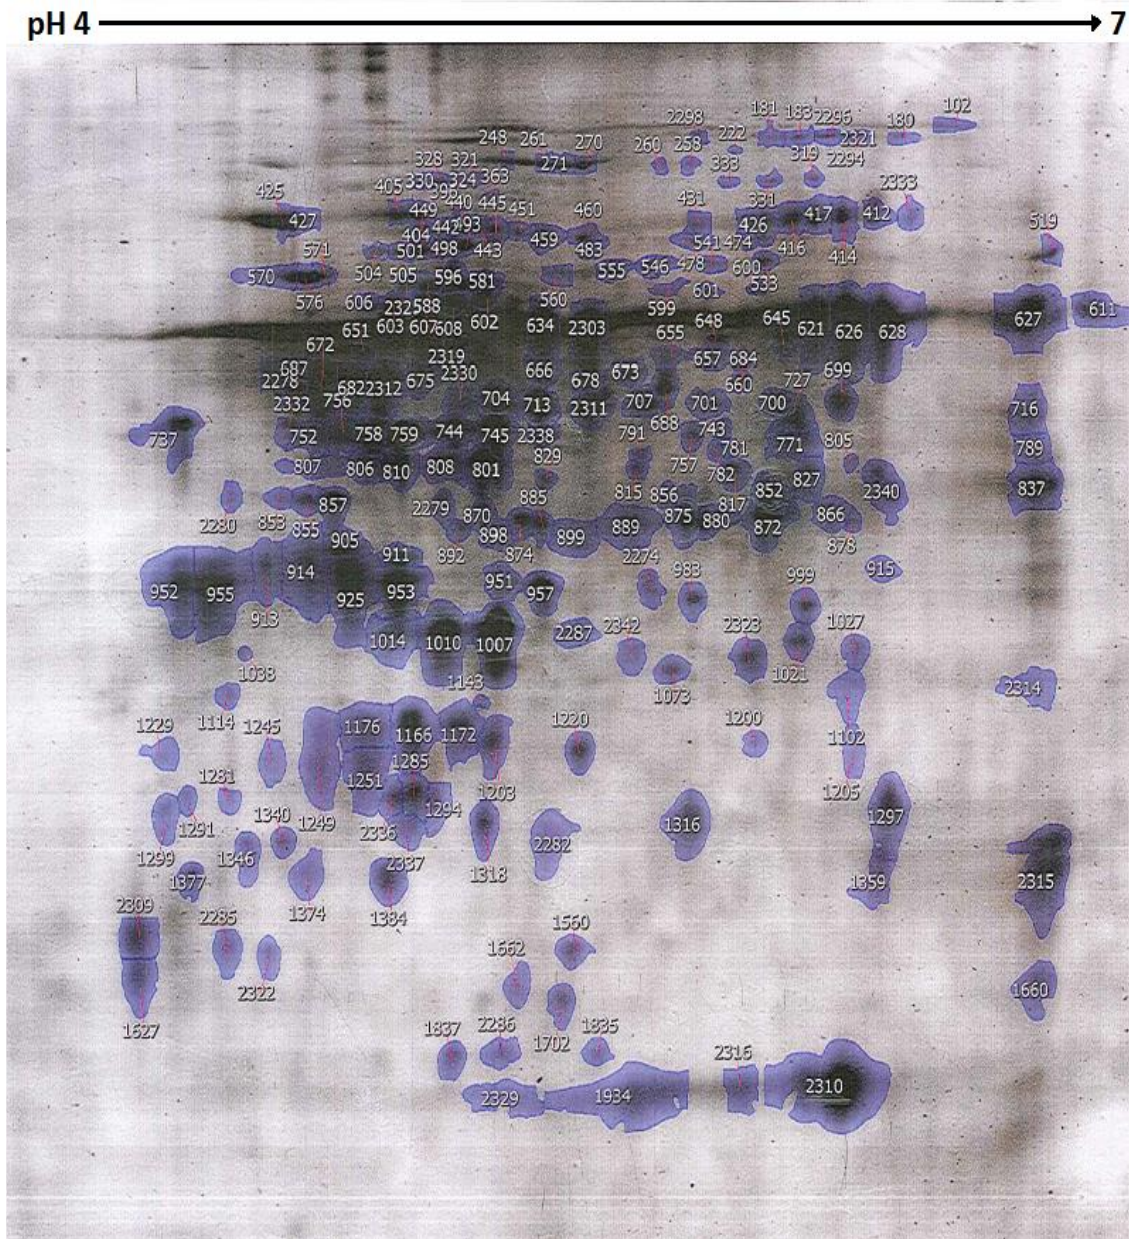

Control, 3 days

**B**

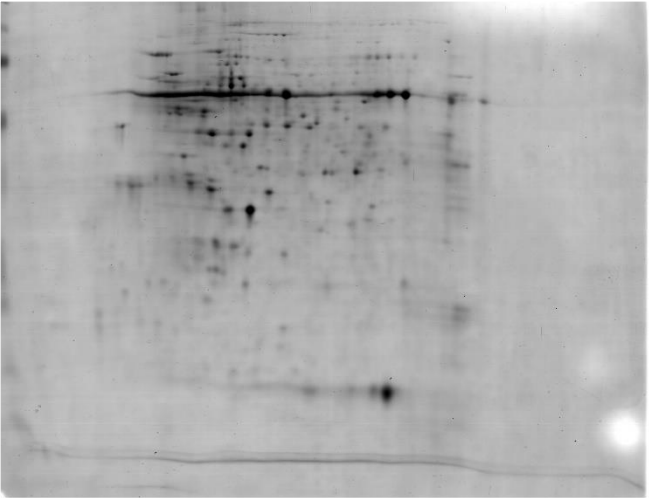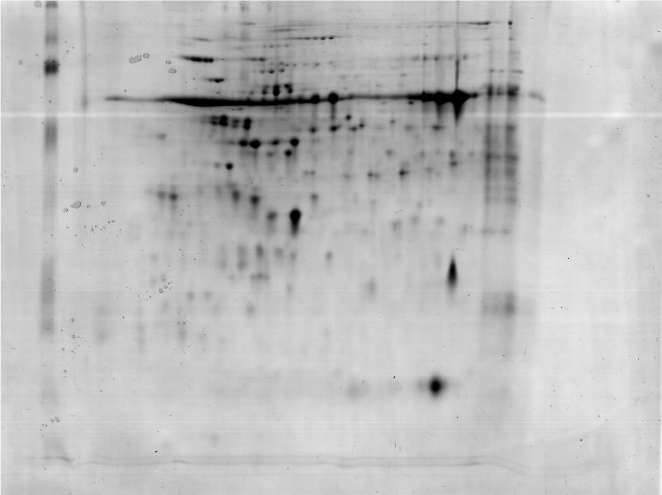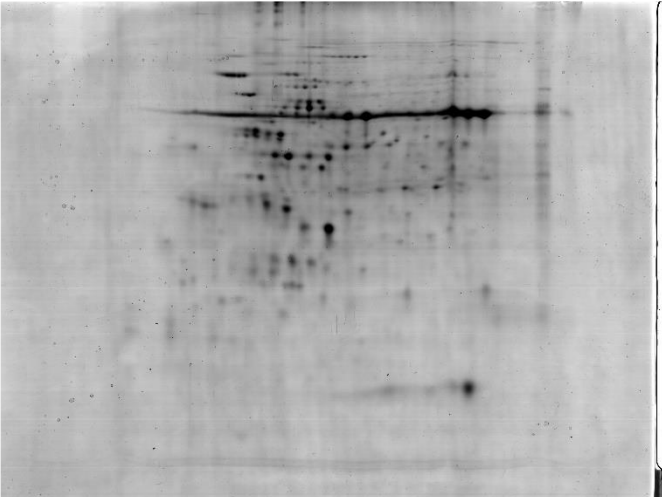

**B**

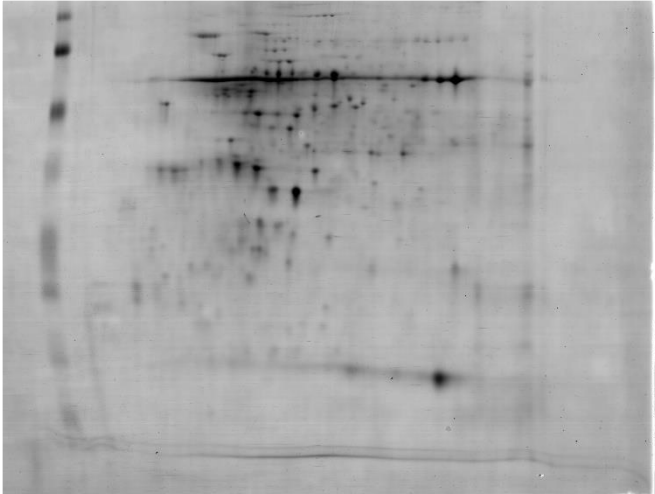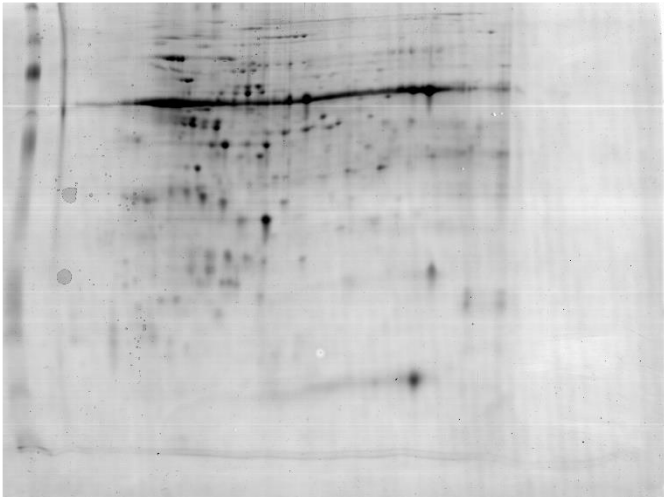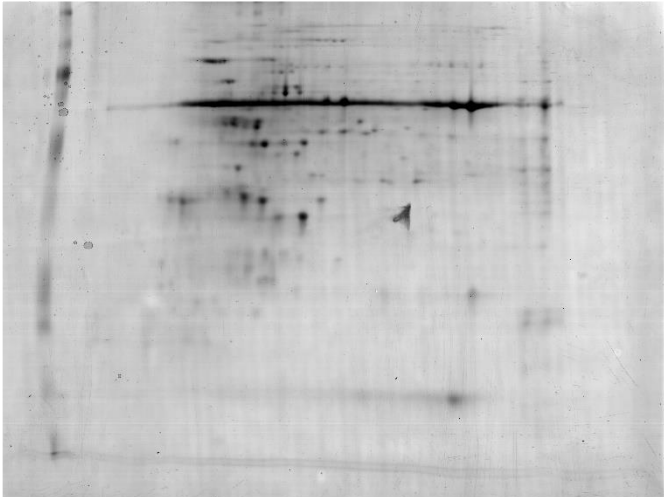

**B**

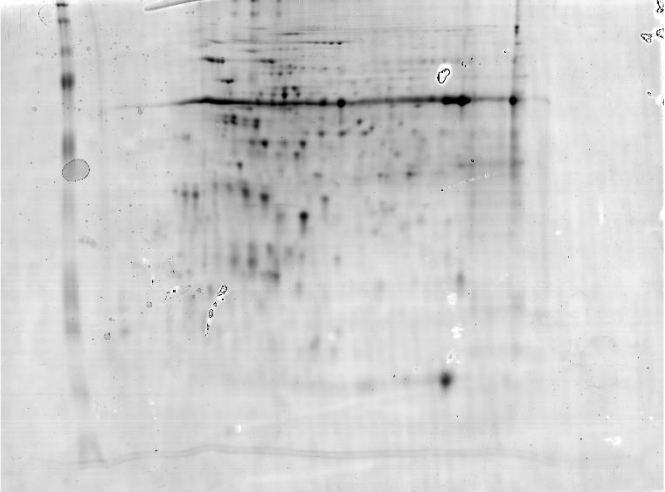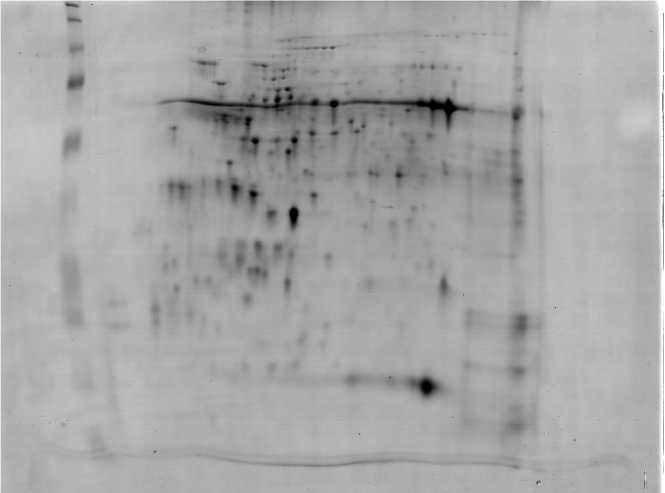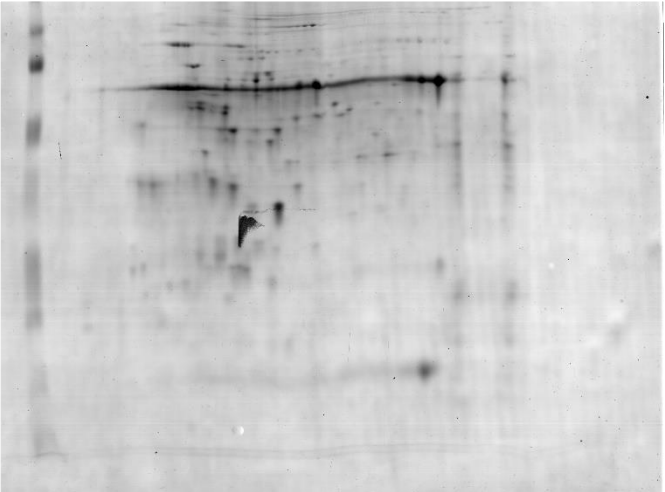

Control, 5 days

**B**

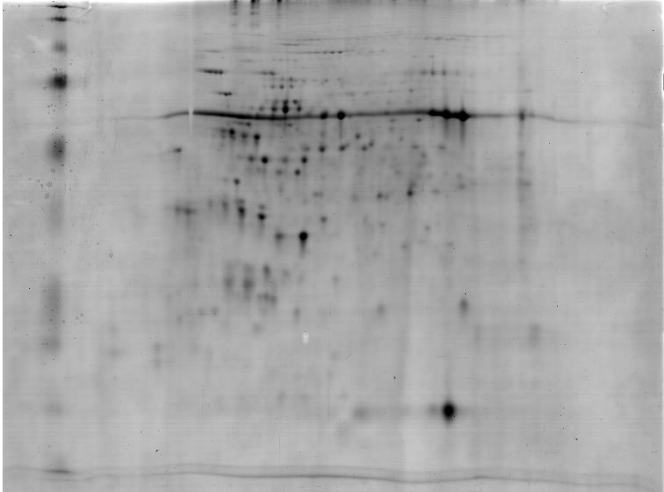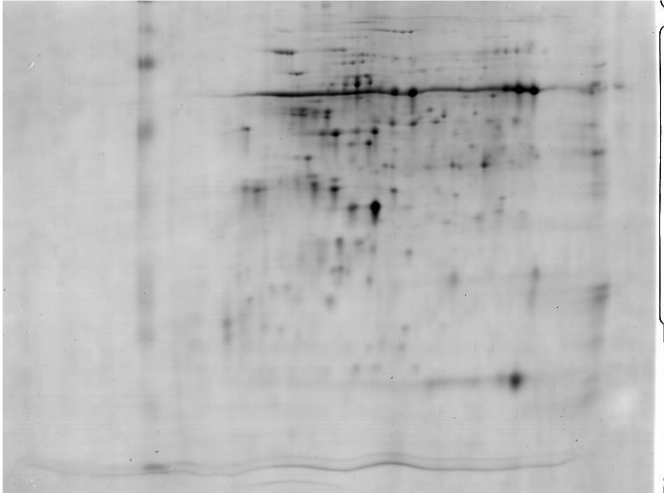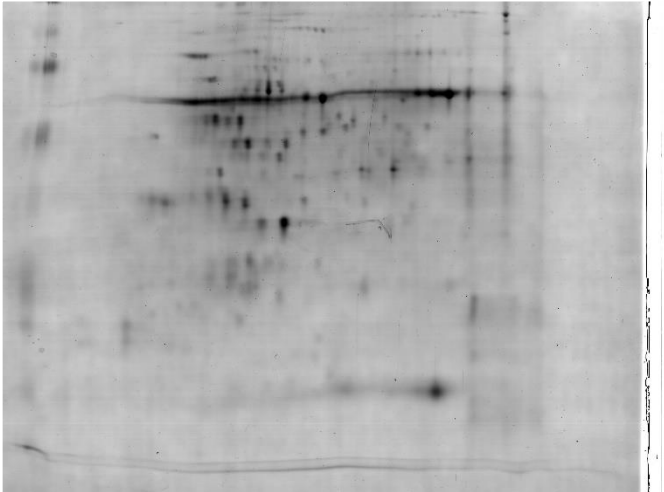

**B**

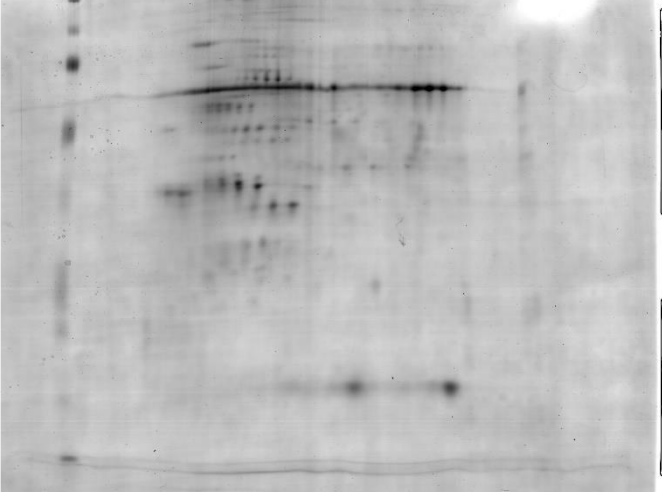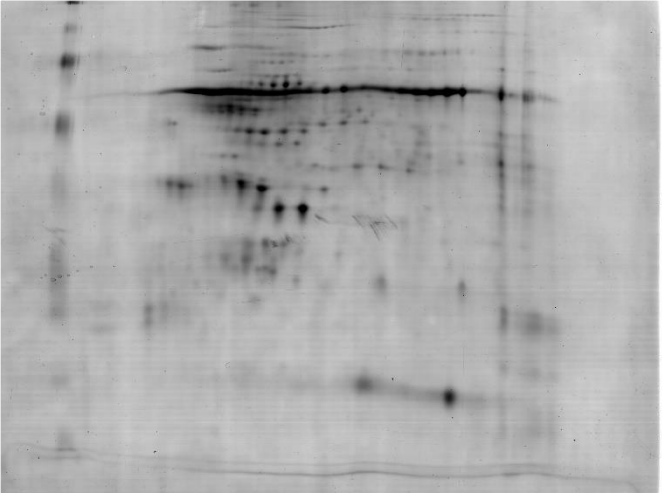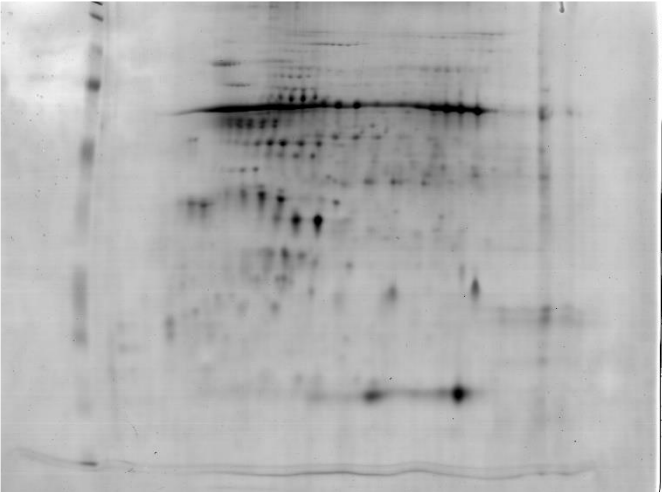

**B**

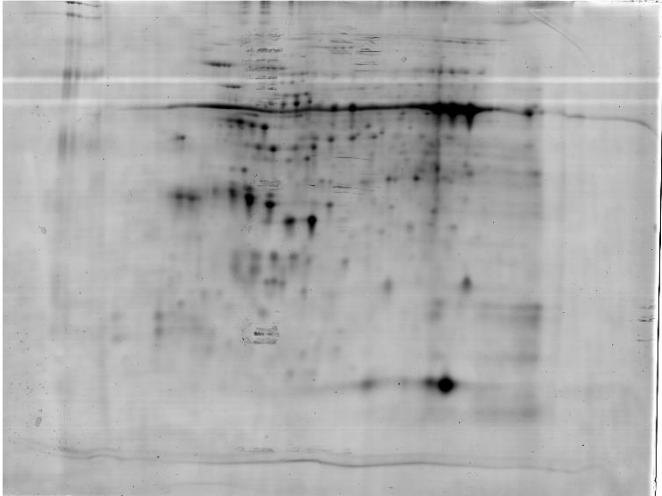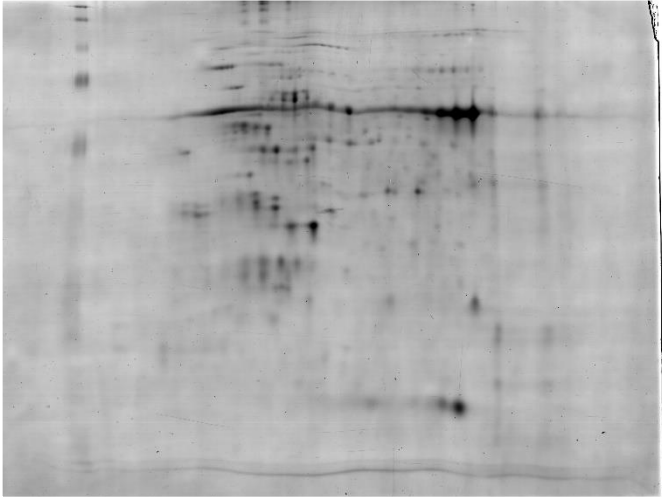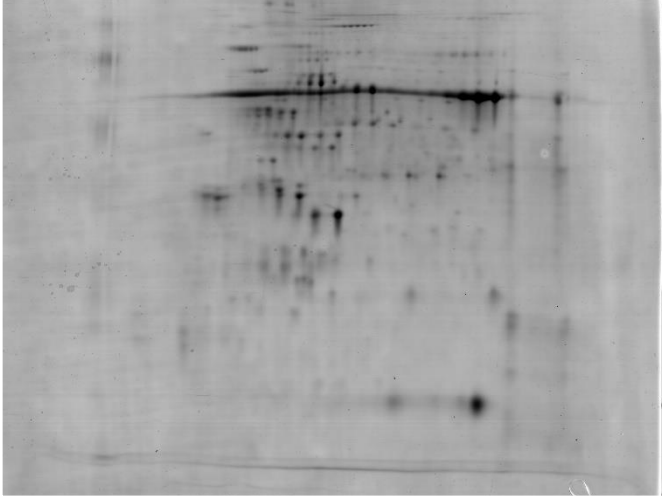

Inoculated Control, 5 days

**B**

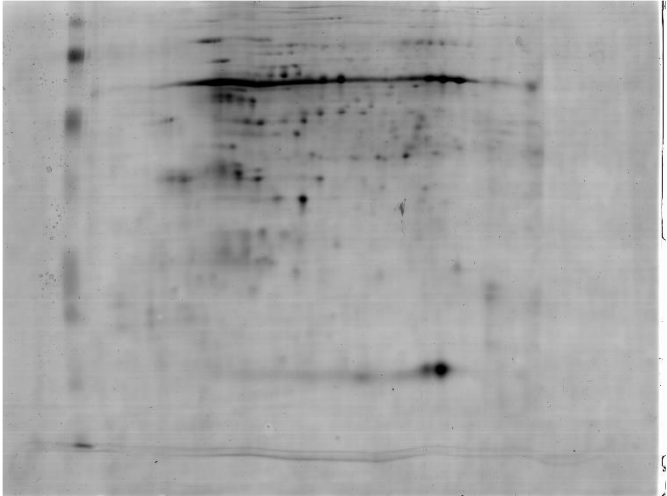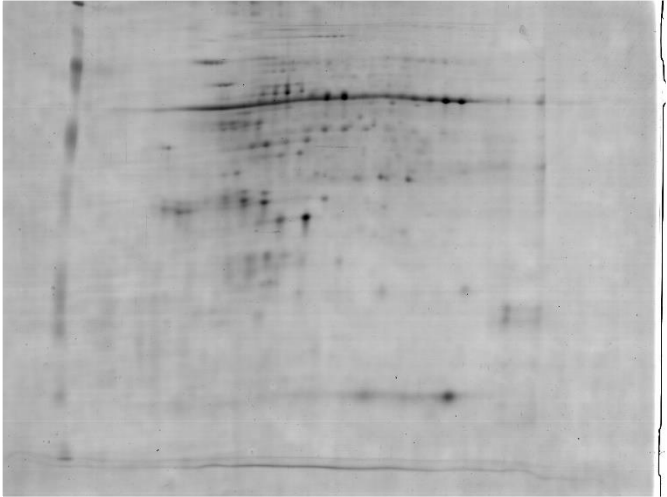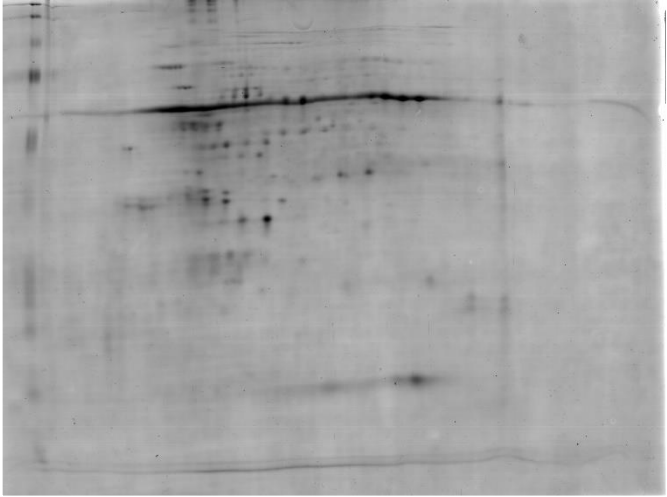



**B**

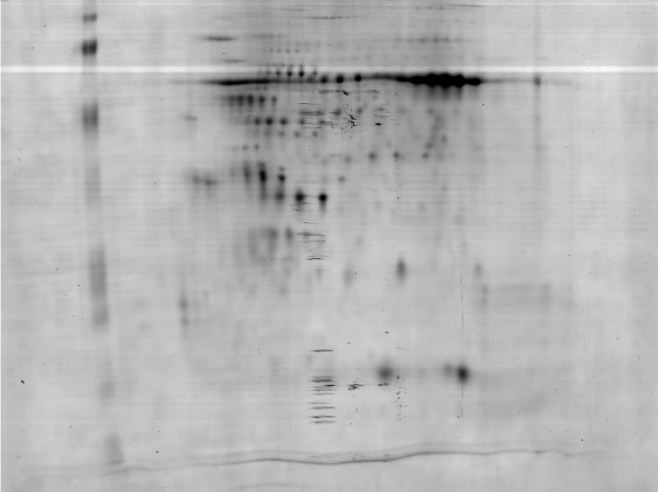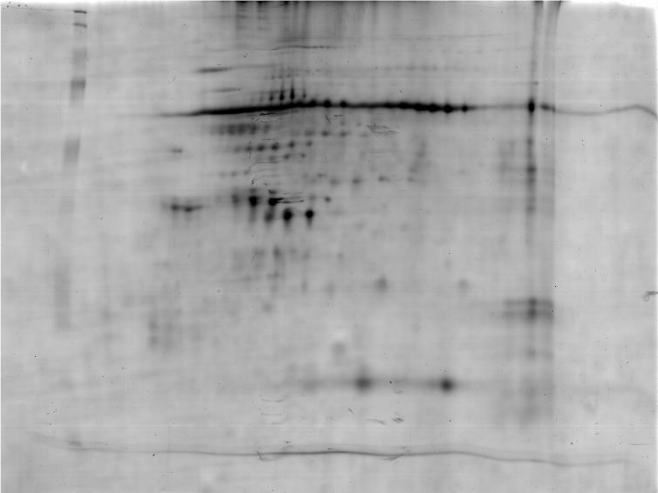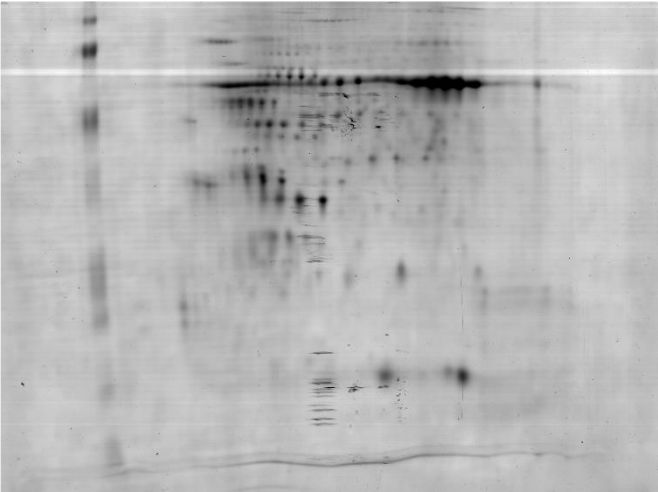

**B**

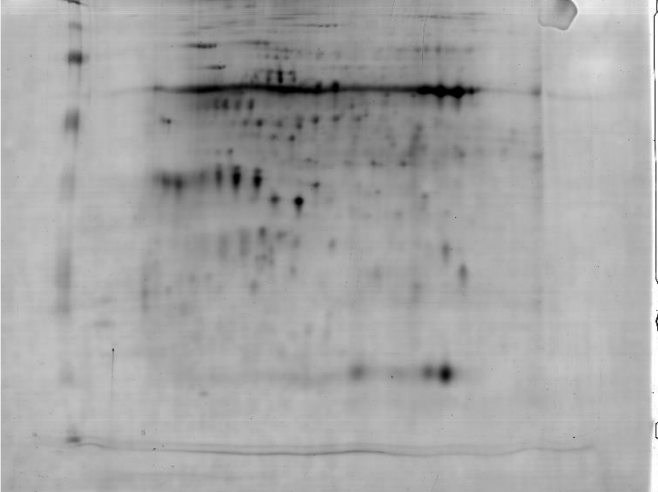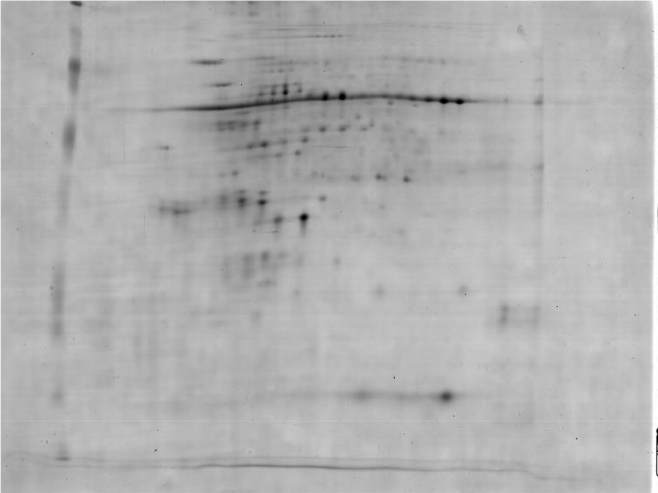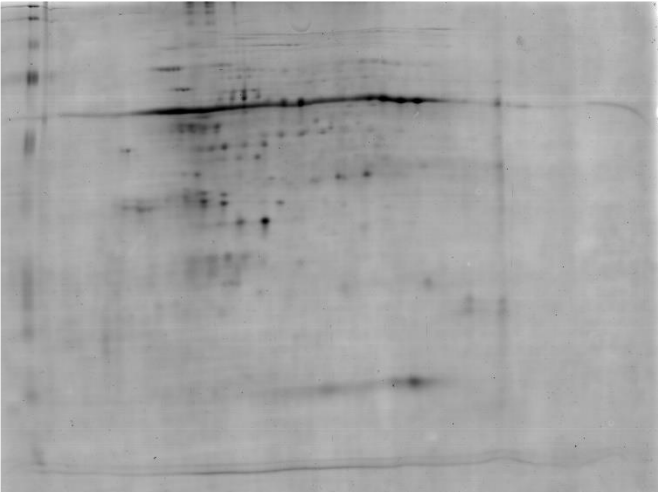

Control, 7 days

**B**

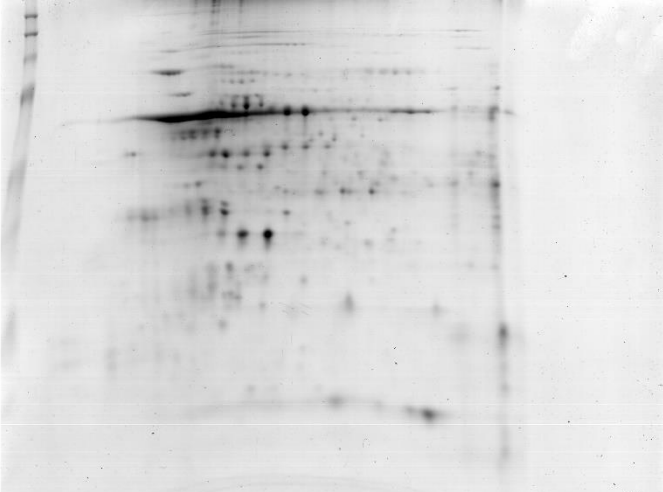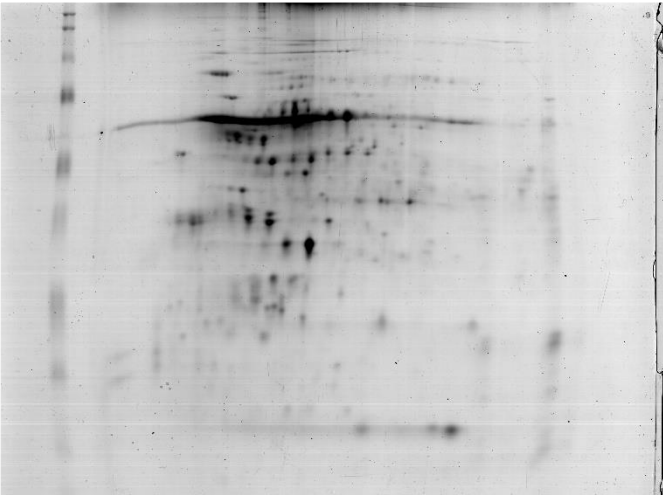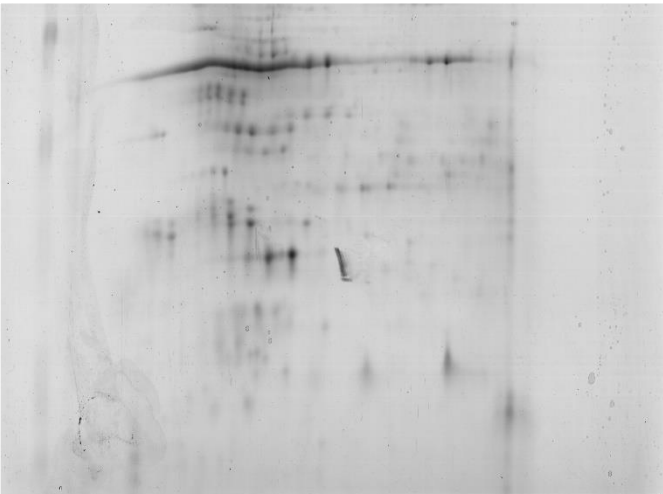

**B**

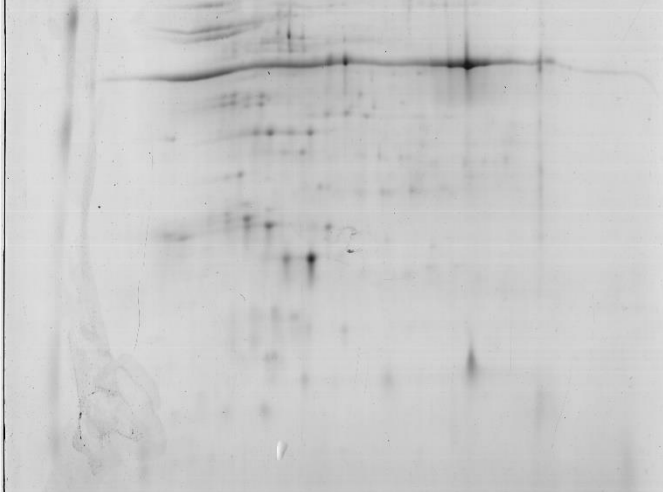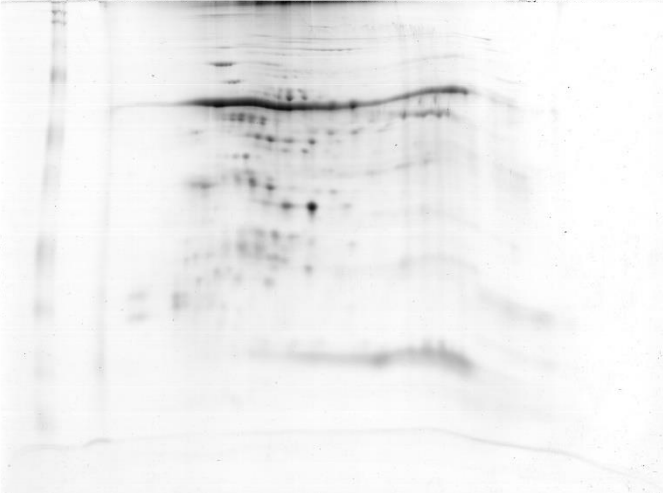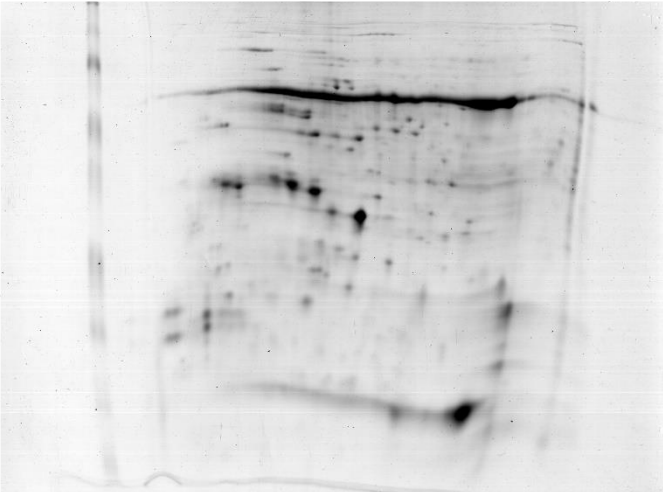

**B**

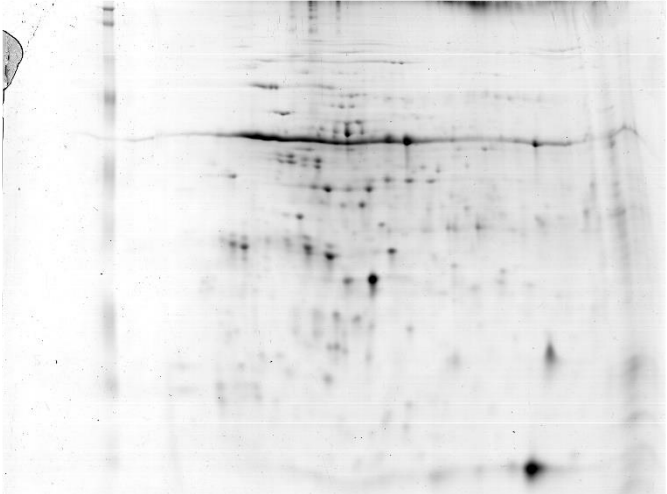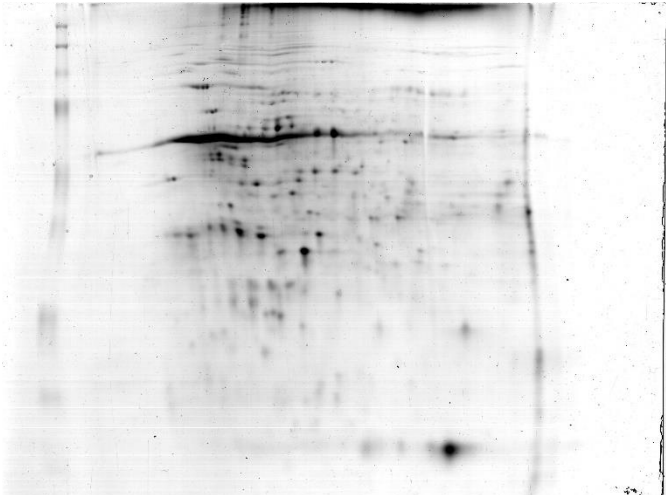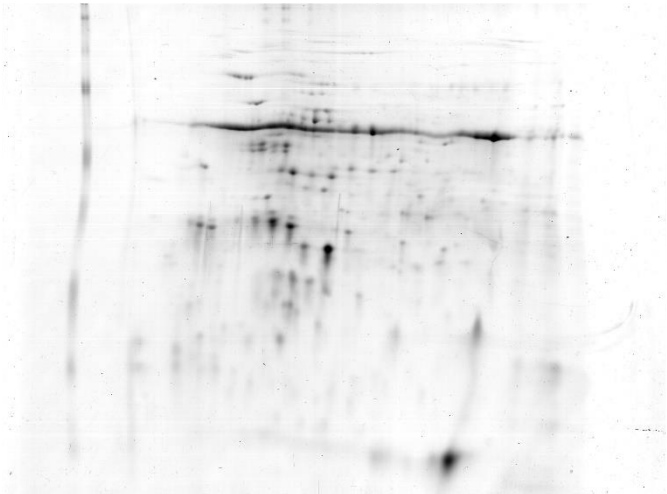

Inoculated Control, 7 days

**B**

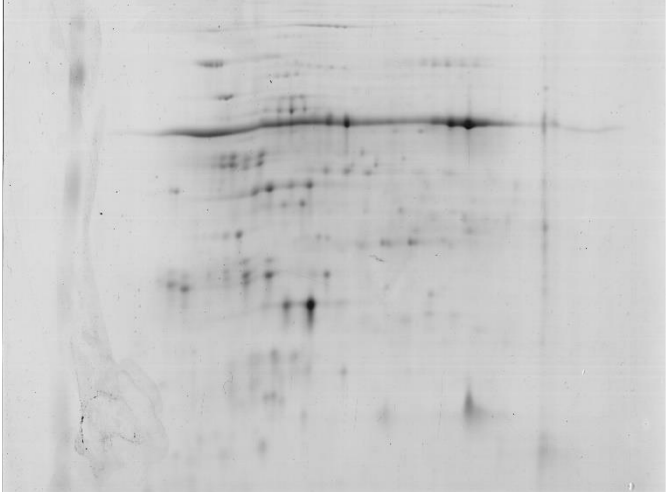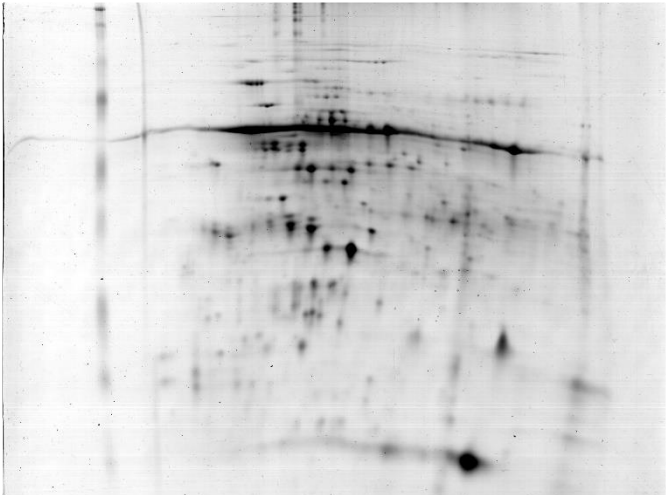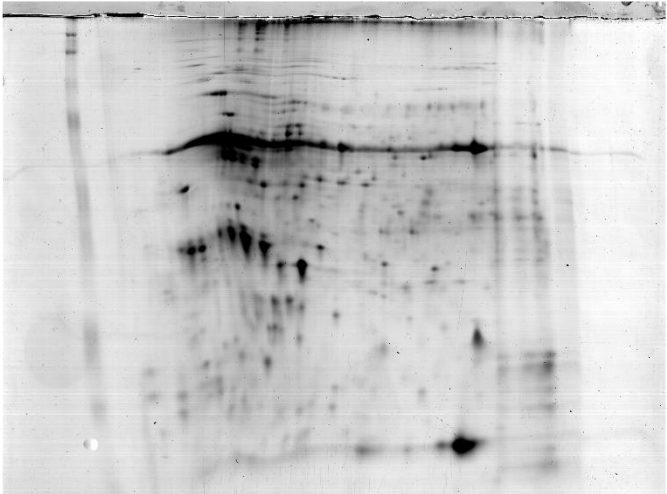

**B**

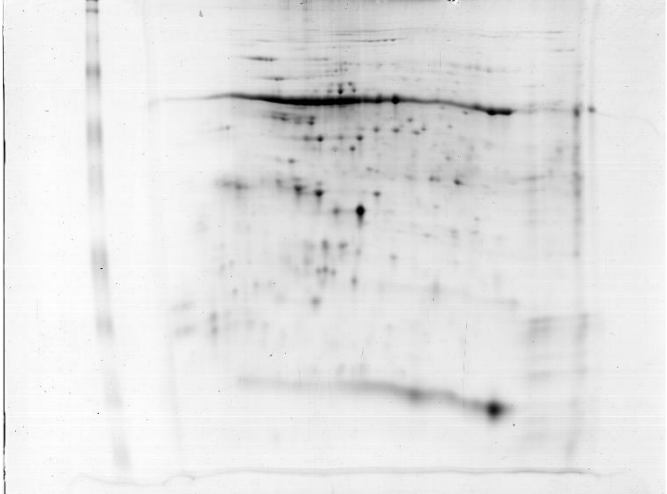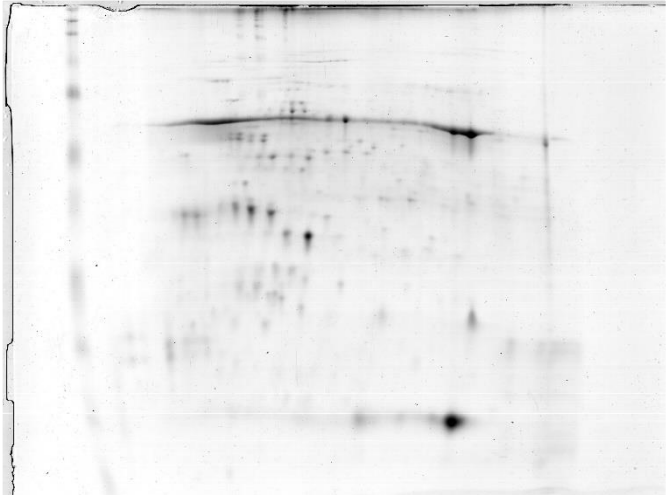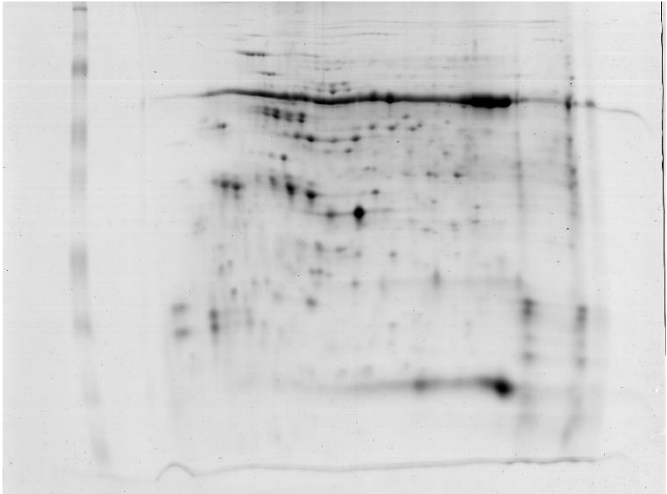

**B**

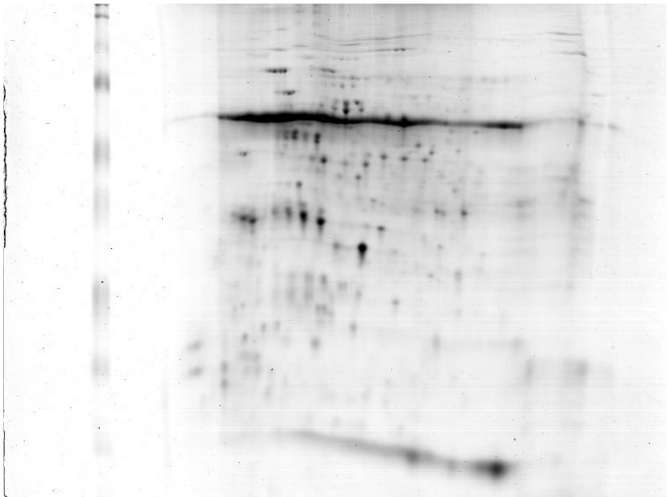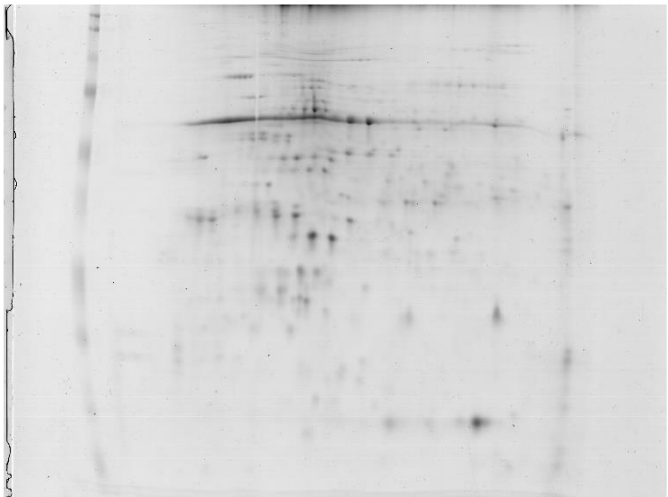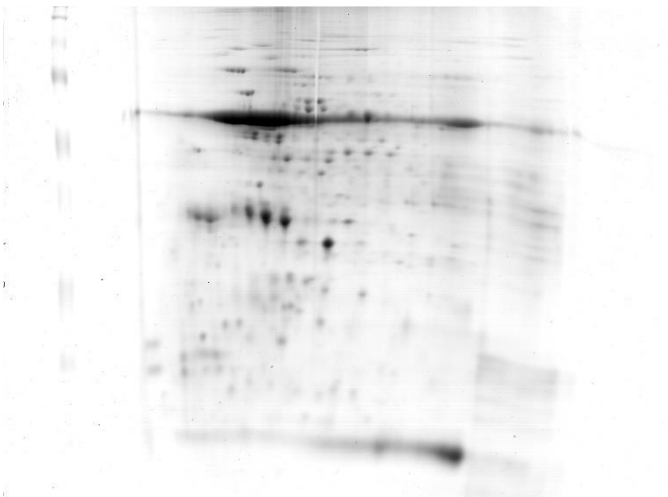

Supplement: Image_1.pdf [file Image_1.pdf]
